# Supplementary material
Source: HighWire-hosted journal article supplement (https://bmjopen.bmj.com/content/9/7/e028228)
Supplement: inline-supplementary-material-1 [file inline-supplementary-material-1.pdf]

'I don't think anybody explained to me how it works': a qualitative study exploring vaccination and primary health service access and uptake amongst Polish and Romanian communities in England

Supplementary table 1: Polish and Romanian participants

| <b>Polish participants</b>   |                                  |               |                         |                                                                     |                                                                                                                                                                                                |
|------------------------------|----------------------------------|---------------|-------------------------|---------------------------------------------------------------------|------------------------------------------------------------------------------------------------------------------------------------------------------------------------------------------------|
| <b>Participant No.</b>       | <b>Current area of residence</b> | <b>Gender</b> | <b>Years in England</b> | <b>Children</b>                                                     | <b>Reported vaccination refusals and vaccinations outside of England</b>                                                                                                                       |
| 1                            | Greater London                   | Female        | 10                      | 2.5-year-old daughter                                               | Child fully vaccinated in England                                                                                                                                                              |
| 2                            | Lincolnshire                     | Female        | 11                      | 5-year-old daughter                                                 | Child fully vaccinated in England                                                                                                                                                              |
| 3                            | Greater London                   | Female        | 10                      | 3.5-year-old son                                                    | Child fully vaccinated. Child was born in Poland and received some early vaccinations there (first year).                                                                                      |
| 5                            | Greater London                   | Female        | 12                      | 34 weeks pregnant. 5-year-old son                                   | Child fully vaccinated aside from influenza vaccination declined.                                                                                                                              |
| 6                            | East Sussex                      | Female        | 9                       | 7-year-old and 1-year old daughter                                  | Child fully vaccinated in England.                                                                                                                                                             |
| 7                            | Greater London                   | Female        | 12                      | Four sons aged 12, 5 and 3 years                                    | Children fully vaccinated. Eldest son received some vaccinations in Poland.                                                                                                                    |
| 8                            | County Durham                    | Male          | 12                      | Wife 37 weeks pregnant at the time of the interview (participant 9) | As someone with asthma, this participant reports receiving the influenza vaccine in England. Reports that he has no concerns about his child being vaccinated in the future.                   |
| 9                            | County Durham                    | Female        | 12                      | 37 weeks pregnant                                                   | Received all recommended vaccinations during pregnancy.                                                                                                                                        |
| 10                           | Cornwall                         | Female        | 14                      | 10-year-old son                                                     | Child fully vaccinated in England. Participant also has influenza vaccinations annually.                                                                                                       |
| 11                           | Cornwall                         | Female        | 10                      | 7-year-old daughter                                                 | Child fully vaccinated in England                                                                                                                                                              |
| 12                           | Northamptonshire                 | Female        | 12                      | 16-year-old son, 2-year-old daughter                                | Children fully vaccinated in England. Son had most vaccinations in Poland. Participant remembers refusing the pertussis vaccine during pregnancy.                                              |
| 13                           | Cornwall                         | Female        | 11                      | 7-year-old son                                                      | Son received some vaccinations in England and Poland (living in Poland until the age of 4 years). Family have all received the flu vaccination as her son has Leukaemia.                       |
| 14                           | Greater London                   | Female        | 10                      | 8-year-old son                                                      | Child fully vaccinated aside from influenza vaccination declined                                                                                                                               |
| 15                           | Lincolnshire                     | Female        | 12                      | 4 children aged 25, 22 and twins aged 15 years                      | Children fully vaccinated in Poland and England.                                                                                                                                               |
| 17                           | Lincolnshire                     | Female        | 13                      | 12-year-old son                                                     | Declined flu vaccination for herself. Child fully vaccinated aside from influenza vaccination declined.                                                                                        |
| 18                           | Lincolnshire                     | Female        | 11                      | 1 daughter aged 5 yrs. Pregnant at the time of interview.           | Daughter received some vaccinations in Poland and England. Declined flu vaccination during pregnancy and for her daughter.                                                                     |
| 19                           | Lincolnshire                     | Female        | 12                      | 2 children.                                                         | Children fully vaccinated in England.                                                                                                                                                          |
| 20                           | Greater London                   | Female        | 12                      | 5-month-old son                                                     | Received all recommended vaccinations during pregnancy and for child.                                                                                                                          |
| 22                           | Greater London                   | Female        | 10                      | 6-year-old daughter                                                 | Declined flu vaccination for herself and daughter. Received all other recommended vaccinations. Also accessed chickenpox vaccination for daughter.                                             |
| 23                           | Norfolk                          | Female        | 13                      | 4-month-old daughter                                                | Declined flu vaccination during pregnancy. Child fully vaccinated in England.                                                                                                                  |
| <b>Romanian participants</b> |                                  |               |                         |                                                                     |                                                                                                                                                                                                |
| 4                            | Berkshire                        | Male          | 9.5                     | 10.5-year-old son                                                   | Child fully vaccinated. Child born in Romania and received some early vaccinations there.                                                                                                      |
| 16                           | Greater London                   | Male          | 3.5                     | 4-month-old son                                                     | Child fully vaccinated in England.                                                                                                                                                             |
| 21                           | Greater London                   | Female        | 11                      | 10-year-old daughter, 3.5-year-old son                              | Children fully vaccinated in England.                                                                                                                                                          |
| 24                           | Wiltshire                        | Female        | 3                       | 2-year-old daughter                                                 | Received all recommended vaccinations during pregnancy and for her daughter                                                                                                                    |
| 25                           | Greater London                   | Female        | 5                       | 20-month-old son                                                    | Child fully vaccinated. Declined flu vaccination during pregnancy.                                                                                                                             |
| 26                           | Hampshire                        | Female        | 10                      | 13-month-old son                                                    | Child fully vaccinated. Declined flu vaccination during pregnancy.                                                                                                                             |
| 27                           | Greater London                   | Female        | 8                       | 13-month-old daughter.                                              | Received all recommended vaccinations during pregnancy and for child.                                                                                                                          |
| 28                           | Greater London                   | Female        | 11                      | 2-year old son                                                      | Received all recommended vaccinations during pregnancy and for child.                                                                                                                          |
| 29                           | Greater London                   | Female        | 18                      | 15-month-old daughter.                                              | As someone with asthma, reports receiving the influenza vaccine in England. Child fully vaccinated.                                                                                            |
| 30                           | Coventry                         | Female        | 10                      | No children.                                                        | As someone with asthma, reports receiving the influenza vaccine in England. She also reports that her mother, in her 60s, also receives the influenza and the pneumococcal vaccine in England. |
